# Supplementary material for: Treadmill training does not enhance skeletal muscle recovery following disuse atrophy in older male mice
Source: PubMed Central journal article supplement (PMC10628510; doi:10.3389/fphys.2023.1263500), 2023-10-24

# Supplemental Figure 1

## Non-receptor Mediated Vasoconstriction

## Receptor Mediated Vasoconstriction

Baseline

A.

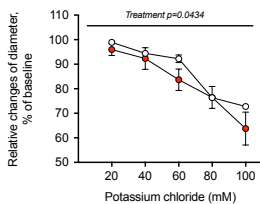

B.

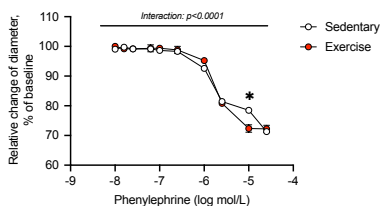

HU

C.

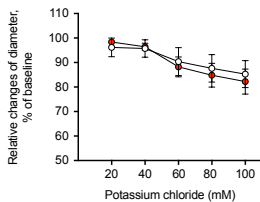

D.

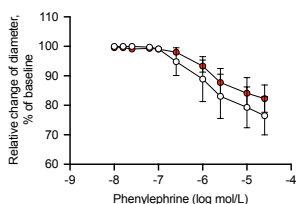

RL4

E.

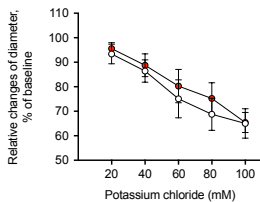

F.

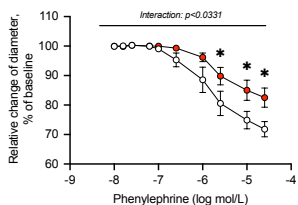

Supplement: Image1.pdf [file Image1.pdf]
