# Supplementary material for: Treadmill training does not enhance skeletal muscle recovery following disuse atrophy in older male mice
Source: PubMed Central journal article supplement (PMC10628510; doi:10.3389/fphys.2023.1263500), 2023-10-24

# Supplemental Figure 2

Tibialis Anterior

A.

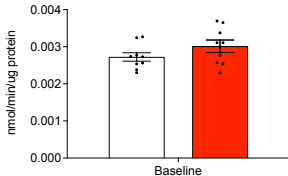

Gastrocnemius

B.

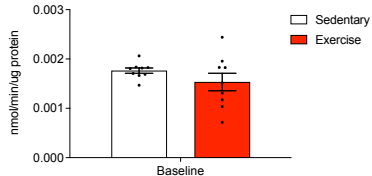

Supplement: Image2.pdf [file Image2.pdf]
